# Supplementary material for: A Secure Online Chat System.
Source: MDPI journal article supplement (doi:10.3390/ani12091061), 2008-01-01
Supplement: s1 [file s1]

**Table S1.** Primer sequences of the genes used in qRT-PCR testing.

| Gene           | Forward prime (5' → 3') | Reverse primer (5' → 3') | Product size<br>(bp) |
|----------------|-------------------------|--------------------------|----------------------|
| <i>MYH7</i>    | CCTCAACGAGACGGTGGT      | TGATACAGCGGACGAAGTG      | 221                  |
| <i>FITM2</i>   | AGCACCACCACTCACCTC      | CCATCAGAACGCTCTTCG       | 194                  |
| <i>IRS2B</i>   | AGAAACCAACCCAATCCT      | TTGAATGTCATCTCCGTGT      | 101                  |
| <i>CD1D</i>    | AACCTCATCTTATCCCTGTCC   | GCTGCCAACTCACTCTTCTG     | 203                  |
| <i>CAMK1D</i>  | GAGGGTAAAGGAGATGTGATG   | AGCAGGATGTATGCGATG       | 131                  |
| <i>COL4A6</i>  | TCCGTGCCACTCCGTTCA      | CTGACAAACTGCTGCGACT      | 112                  |
| <i>SCUB1</i>   | GCAAAGTGCCATTTACGG      | GCAGCTTCTGCTCCATCC       | 274                  |
| <i>FABP3</i>   | GGCTCACCAAACCCACCA      | TGTCTCCTTCCCGTCCCAC      | 206                  |
| <i>MCM3</i>    | GCGTGCCCTGAAGGATTT      | GGACGACCTTTGGACGAAC      | 197                  |
| <i>CYP3A28</i> | CTGCCCAACAAGGCTACT      | ATTGATCTCCACCGTCTG       | 138                  |
| <i>CLPS</i>    | GCAGAGTCCCAGGATTGC      | TCACTGTTGGTGACAGAGCC     | 119                  |
| <i>ACOX2</i>   | AGGCTCACTGCCACTACAT     | GAAGTCAAACGCATCCAC       | 257                  |
| <i>GFPT2</i>   | ATTATGCCACTTGTCTGG      | AAATGATTGGACGACCCT       | 213                  |
| <i>CCNB2</i>   | AGAGGAGGATTTGTGCCA      | CTTCCCGTCAAGGTAGTG       | 175                  |
| <i>CX3C</i>    | TCATCTTGGTTGTGGTGGTC    | GCAATGGTTTCGGTCAGG       | 151                  |
| <i>ACAP3</i>   | ATTCTGCCACCGACTCCC      | GAATGCCCAGGTTGATGC       | 138                  |
| <i>β-Actin</i> | GTGGATCAGCAAGCAGGAGT    | TCATCACAAGGGTGTGGGTG     | 101                  |
